# Supplementary material for: Dietary patterns according to vitamin supplement use. A cross-sectional study in Switzerland
Source: Atypon-hosted journal article supplement (doi:10.1024/0300-9831/a000679), 2020-09-04
Supplement: 0300-9831_a000679_esm2.pdf [file 0300-9831_a000679_esm2.pdf]

## VOTRE ALIMENTATION

Ce questionnaire porte sur votre alimentation au cours **des 4 dernières semaines**.

Pour chaque type d'aliment, nous vous demandons d'indiquer la **fréquence de votre consommation**, puis de comparer **votre portion habituelle** à la portion de référence selon l'exemple ci-dessous. Nous vous remercions sincèrement pour vos réponses.

| <b>Exemple :</b>                         |                                 | Cette personne a mangé le mois dernier du pain complet midi et soir, donc 2 fois par jour; elle a mangé 2 tranches de pain à chaque fois, donc plus que la portion de référence.<br>Elle a mangé du beefsteak 1 à 2 fois par semaine, sa tranche de viande pesant environ 150 grammes donc pareille à la portion moyenne de référence. |                  |                     |                     |              |                      |                      |               |        |      |
|------------------------------------------|---------------------------------|----------------------------------------------------------------------------------------------------------------------------------------------------------------------------------------------------------------------------------------------------------------------------------------------------------------------------------------|------------------|---------------------|---------------------|--------------|----------------------|----------------------|---------------|--------|------|
| ALIMENTS                                 | FREQUENCE                       |                                                                                                                                                                                                                                                                                                                                        |                  |                     |                     |              |                      | QUANTITE             |               |        |      |
|                                          | Jamais ces 4 dernières semaines | 1 x par mois                                                                                                                                                                                                                                                                                                                           | 2 à 3 x par mois | 1 à 2 x par semaine | 3 à 4 x par semaine | 1 x par jour | 2 x ou plus par jour | Portion de référence | Votre portion |        |      |
|                                          |                                 |                                                                                                                                                                                                                                                                                                                                        |                  |                     |                     |              |                      |                      | moins         | pareil | plus |
| Pain complet, au seigle                  |                                 |                                                                                                                                                                                                                                                                                                                                        |                  |                     |                     |              | X                    | 50 g = 1 tranche     |               |        | X    |
| Beefsteak, cheval veau (escalope, filet) |                                 |                                                                                                                                                                                                                                                                                                                                        |                  | X                   |                     |              |                      | 150 g                |               | X      |      |

## PARTIE À REMPLIR

| 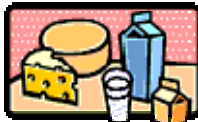<br><b>ALIMENTS</b> | FREQUENCE                                |                 |                     |                           |                           |                 |                            | QUANTITE                                   |               |        |      |
|--------------------------------------------------------------------------------------------------------|------------------------------------------|-----------------|---------------------|---------------------------|---------------------------|-----------------|----------------------------|--------------------------------------------|---------------|--------|------|
|                                                                                                        | Jamais<br>ces 4<br>dernières<br>semaines | 1 x par<br>mois | 2 à 3 x<br>par mois | 1 à 2 x<br>par<br>semaine | 3 à 4 x<br>par<br>semaine | 1 x par<br>jour | 2 x ou<br>plus par<br>jour | Portion de<br>référence                    | Votre portion |        |      |
|                                                                                                        |                                          |                 |                     |                           |                           |                 |                            |                                            | moins         | pareil | plus |
| FROMAGES, YAOURTS                                                                                      |                                          |                 |                     |                           |                           |                 |                            |                                            |               |        |      |
| Yaourt nature                                                                                          |                                          |                 |                     |                           |                           |                 |                            | 1 yaourt = 180g                            |               |        |      |
| Yaourt light, flan light,<br>crème light                                                               |                                          |                 |                     |                           |                           |                 |                            | 1 yaourt = 180g                            |               |        |      |
| Yaourt aux fruits,<br>flan, crème dessert                                                              |                                          |                 |                     |                           |                           |                 |                            | 1 yaourt = 180g                            |               |        |      |
| Fromage blanc 0%                                                                                       |                                          |                 |                     |                           |                           |                 |                            | 120 g                                      |               |        |      |
| Fromage blanc 20%,<br>ricotta, séré, cottage-<br>cheese                                                |                                          |                 |                     |                           |                           |                 |                            | 100 g                                      |               |        |      |
| Feta, mozzarella,<br>fromage frais 1/2 sel,<br>petit-suisse                                            |                                          |                 |                     |                           |                           |                 |                            | 40 g =<br>1 petit-suisse                   |               |        |      |
| Gruyère, tomme,<br>camembert, bleu,<br>parmesan                                                        |                                          |                 |                     |                           |                           |                 |                            | 40 g = taille d'une<br>boîte d'allumettes  |               |        |      |
| Fondue au fromage                                                                                      |                                          |                 |                     |                           |                           |                 |                            | 20 bouchées =<br>3 à 4 tranches<br>de pain |               |        |      |

| 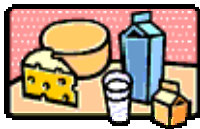<br><b>ALIMENTS</b> | FREQUENCE                                |                 |                     |                           |                           |                 |                            | QUANTITE                      |               |        |      |
|------------------------------------------------------------------------------------------------------|------------------------------------------|-----------------|---------------------|---------------------------|---------------------------|-----------------|----------------------------|-------------------------------|---------------|--------|------|
|                                                                                                      | Jamais<br>ces 4<br>dernières<br>semaines | 1 x par<br>mois | 2 à 3 x<br>par mois | 1 à 2 x<br>par<br>semaine | 3 à 4 x<br>par<br>semaine | 1 x par<br>jour | 2 x ou<br>plus par<br>jour | Portion de<br>référence       | Votre portion |        |      |
|                                                                                                      |                                          |                 |                     |                           |                           |                 |                            |                               | moins         | pareil | plus |
| PAIN, CÉRÉALES                                                                                       |                                          |                 |                     |                           |                           |                 |                            |                               |               |        |      |
| Pain blanc, pain de mie, de campagne, au lait, tresse                                                |                                          |                 |                     |                           |                           |                 |                            | 50 g = 1 tranche              |               |        |      |
| Pain complet, pain au seigle                                                                         |                                          |                 |                     |                           |                           |                 |                            | 50 g = 1 tranche              |               |        |      |
| Müesli ou autres céréales mélangées                                                                  |                                          |                 |                     |                           |                           |                 |                            | 50 g =<br>½ gobelet de yaourt |               |        |      |
| Corn-flakes, blé soufflé, céréales soufflées                                                         |                                          |                 |                     |                           |                           |                 |                            | 30 g =<br>1 gobelet de yaourt |               |        |      |
| Biscottes, cracottes, pain grillé «suédois»                                                          |                                          |                 |                     |                           |                           |                 |                            | 18 g =<br>3 pièces            |               |        |      |

| 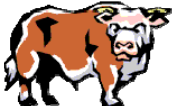<br>ALIMENTS | FREQUENCE                                |                 |                     |                           |                           |                 |                            | QUANTITE                                                  |               |        |      |
|------------------------------------------------------------------------------------------------|------------------------------------------|-----------------|---------------------|---------------------------|---------------------------|-----------------|----------------------------|-----------------------------------------------------------|---------------|--------|------|
|                                                                                                | Jamais<br>ces 4<br>dernières<br>semaines | 1 x par<br>mois | 2 à 3 x<br>par mois | 1 à 2 x<br>par<br>semaine | 3 à 4 x<br>par<br>semaine | 1 x par<br>jour | 2 x ou<br>plus par<br>jour | Portion de<br>référence                                   | Votre portion |        |      |
|                                                                                                |                                          |                 |                     |                           |                           |                 |                            |                                                           | Moins         | pareil | plus |
| VIANDES                                                                                        |                                          |                 |                     |                           |                           |                 |                            |                                                           |               |        |      |
| Beefsteak, cheval,<br>veau (escalope, filet)                                                   |                                          |                 |                     |                           |                           |                 |                            | 150 g                                                     |               |        |      |
| Poulet sans peau                                                                               |                                          |                 |                     |                           |                           |                 |                            | 80 g = 1 blanc<br>de poulet                               |               |        |      |
| Poulet avec peau                                                                               |                                          |                 |                     |                           |                           |                 |                            | 80 g = 1 blanc<br>de poulet                               |               |        |      |
| Steak haché,<br>entrecôte, rôti (bœuf,<br>porc, veau)                                          |                                          |                 |                     |                           |                           |                 |                            | 100 g                                                     |               |        |      |
| Jambon, pot-au-feu<br>côtelettes d'agneau<br>côtes de porc                                     |                                          |                 |                     |                           |                           |                 |                            | 50 g = 2 tranches<br>fines de jambon<br>ou<br>1 côtelette |               |        |      |
| Saucisson, jambon<br>cru, lard maigre,<br>salami                                               |                                          |                 |                     |                           |                           |                 |                            | 50 g =<br>2 tranches                                      |               |        |      |
| Pâté, terrine                                                                                  |                                          |                 |                     |                           |                           |                 |                            | 50 g =<br>½ tranche                                       |               |        |      |
| Cervelas                                                                                       |                                          |                 |                     |                           |                           |                 |                            | 1 pièce                                                   |               |        |      |
| Saucisse                                                                                       |                                          |                 |                     |                           |                           |                 |                            | 1 pièce                                                   |               |        |      |
| Foie de veau, de<br>génisse, de porc                                                           |                                          |                 |                     |                           |                           |                 |                            | 130 g =<br>1 tranche                                      |               |        |      |
| Foie de volaille                                                                               |                                          |                 |                     |                           |                           |                 |                            | 50 g = 1 pièce                                            |               |        |      |

| 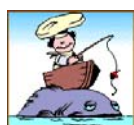<br>ALIMENTS | FREQUENCE                                |                 |                     |                           |                           |                 |                            | QUANTITE                        |               |        |      |
|-----------------------------------------------------------------------------------------------|------------------------------------------|-----------------|---------------------|---------------------------|---------------------------|-----------------|----------------------------|---------------------------------|---------------|--------|------|
|                                                                                               | Jamais<br>ces 4<br>dernières<br>semaines | 1 x par<br>mois | 2 à 3 x<br>par mois | 1 à 2 x<br>par<br>semaine | 3 à 4 x<br>par<br>semaine | 1 x par<br>jour | 2 x ou<br>plus par<br>jour | Portion de<br>référence         | Votre portion |        |      |
|                                                                                               |                                          |                 |                     |                           |                           |                 |                            |                                 | moins         | pareil | plus |
| POISSONS, CRUSTACÉS                                                                           |                                          |                 |                     |                           |                           |                 |                            |                                 |               |        |      |
| Saumon frais,<br>saumon fumé                                                                  |                                          |                 |                     |                           |                           |                 |                            | 100 g = 1 darne<br>= 2 tranches |               |        |      |
| Poisson frit, pané,<br>filets de perche                                                       |                                          |                 |                     |                           |                           |                 |                            | 150 g = 3<br>grands sticks      |               |        |      |
| Thon à l'huile                                                                                |                                          |                 |                     |                           |                           |                 |                            | 40 g = ½ boîte                  |               |        |      |
| Poisson maigre type<br>cabillaud, colin, truite                                               |                                          |                 |                     |                           |                           |                 |                            | 150 g                           |               |        |      |
| Crevettes,<br>coquillages                                                                     |                                          |                 |                     |                           |                           |                 |                            | 80 g                            |               |        |      |

| 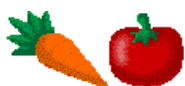<br><b>ALIMENTS</b> | FREQUENCE                                |                 |                     |                           |                           |                 |                            | QUANTITE                                        |               |        |      |  |
|------------------------------------------------------------------------------------------------------|------------------------------------------|-----------------|---------------------|---------------------------|---------------------------|-----------------|----------------------------|-------------------------------------------------|---------------|--------|------|--|
|                                                                                                      | Jamais<br>ces 4<br>dernières<br>semaines | 1 x par<br>mois | 2 à 3 x<br>par mois | 1 à 2 x<br>par<br>semaine | 3 à 4 x<br>par<br>semaine | 1 x par<br>jour | 2 x ou<br>plus par<br>jour | Portion de<br>référence                         | Votre portion |        |      |  |
|                                                                                                      |                                          |                 |                     |                           |                           |                 |                            |                                                 | moins         | pareil | plus |  |
| <b>LÉGUMES</b>                                                                                       |                                          |                 |                     |                           |                           |                 |                            |                                                 |               |        |      |  |
| Haricots verts,<br>épinards                                                                          |                                          |                 |                     |                           |                           |                 |                            | 180 g =<br>1 gobelet yaourt                     |               |        |      |  |
| Choux-fleurs,<br>brocolis                                                                            |                                          |                 |                     |                           |                           |                 |                            | 180 g =<br>1 gobelet yaourt                     |               |        |      |  |
| Tomates                                                                                              |                                          |                 |                     |                           |                           |                 |                            | 180 g =<br>1 grosse ou 2<br>petites tomates     |               |        |      |  |
| Carottes                                                                                             |                                          |                 |                     |                           |                           |                 |                            | 100 g =<br>1 gobelet yaourt                     |               |        |      |  |
| Salade verte                                                                                         |                                          |                 |                     |                           |                           |                 |                            | 100 g =<br>1 gobelet yaourt                     |               |        |      |  |
| Vinaigrette                                                                                          |                                          |                 |                     |                           |                           |                 |                            | 15 g =<br>1 cuil soupe                          |               |        |      |  |
| Petits pois,<br>maïs en grains                                                                       |                                          |                 |                     |                           |                           |                 |                            | 75 g =<br>½ gobelet yaourt                      |               |        |      |  |
| Avocat                                                                                               |                                          |                 |                     |                           |                           |                 |                            | 100 g =<br>½ avocat                             |               |        |      |  |
| Soupe de légumes<br>claire<br>(bouillon de légumes)                                                  |                                          |                 |                     |                           |                           |                 |                            | 300 ml = 1 bol ou<br>1 assiette à<br>soupe      |               |        |      |  |
| Soupe de légumes<br>épaisse (aux pois,<br>haricots, minestrone)                                      |                                          |                 |                     |                           |                           |                 |                            | 300 ml = 1 bol ou<br>1 assiette à<br>soupe      |               |        |      |  |
| Pommes de terre<br>nature                                                                            |                                          |                 |                     |                           |                           |                 |                            | 150 g = 1 grosse<br>ou 2 petites p. de<br>terre |               |        |      |  |
| Frites                                                                                               |                                          |                 |                     |                           |                           |                 |                            | 120 g =<br>1 poignée                            |               |        |      |  |

| 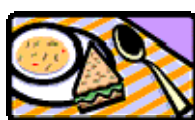<br>ALIMENTS   | FREQUENCE                                |                 |                     |                           |                           |                 |                            | QUANTITE                               |               |        |      |  |
|-------------------------------------------------------------------------------------------------|------------------------------------------|-----------------|---------------------|---------------------------|---------------------------|-----------------|----------------------------|----------------------------------------|---------------|--------|------|--|
|                                                                                                 | Jamais<br>ces 4<br>dernières<br>semaines | 1 x par<br>mois | 2 à 3 x<br>par mois | 1 à 2 x<br>par<br>semaine | 3 à 4 x<br>par<br>semaine | 1 x par<br>jour | 2 x ou<br>plus par<br>jour | Portion de<br>référence                | Votre portion |        |      |  |
|                                                                                                 |                                          |                 |                     |                           |                           |                 |                            |                                        | moins         | pareil | plus |  |
| AUTRES                                                                                          |                                          |                 |                     |                           |                           |                 |                            |                                        |               |        |      |  |
| Pâtes alimentaires                                                                              |                                          |                 |                     |                           |                           |                 |                            | 180 g cuites =<br>70 g crues           |               |        |      |  |
| Raviolis, tortellinis,<br>cannellonis                                                           |                                          |                 |                     |                           |                           |                 |                            | 150 g cuits =<br>env. 10 raviolis      |               |        |      |  |
| Riz                                                                                             |                                          |                 |                     |                           |                           |                 |                            | 150 g cuit =<br>60 g cru               |               |        |      |  |
| Sauce tomate                                                                                    |                                          |                 |                     |                           |                           |                 |                            | 80 g =<br>2 cuil soupe                 |               |        |      |  |
| Semoule de blé,<br>couscous                                                                     |                                          |                 |                     |                           |                           |                 |                            | 80 g cuit =<br>2 cuil soupe            |               |        |      |  |
| Pizza                                                                                           |                                          |                 |                     |                           |                           |                 |                            | ½ pizza de la<br>pizzeria              |               |        |      |  |
| Quiche lorraine                                                                                 |                                          |                 |                     |                           |                           |                 |                            | 100 g =<br>1 ramequin                  |               |        |      |  |
| Œufs                                                                                            |                                          |                 |                     |                           |                           |                 |                            | 2                                      |               |        |      |  |
| Tofu                                                                                            |                                          |                 |                     |                           |                           |                 |                            | 65 g                                   |               |        |      |  |
| VOUS AJOUTEZ SUR VOS PLATS OU SUR VOTRE PAIN                                                    |                                          |                 |                     |                           |                           |                 |                            |                                        |               |        |      |  |
| Margarine allégée                                                                               |                                          |                 |                     |                           |                           |                 |                            | 10 g =<br>1 cuil à café                |               |        |      |  |
| Beurre                                                                                          |                                          |                 |                     |                           |                           |                 |                            | 10 g =<br>portion bistrot              |               |        |      |  |
| Crème fraîche<br>entière 35 %                                                                   |                                          |                 |                     |                           |                           |                 |                            | 20 g =<br>1 cuil soupe                 |               |        |      |  |
| Mayonnaise                                                                                      |                                          |                 |                     |                           |                           |                 |                            | 10 g =<br>1 cuil à café                |               |        |      |  |
| 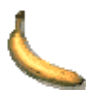<br>ALIMENTS | FREQUENCE                                |                 |                     |                           |                           |                 |                            | QUANTITE                               |               |        |      |  |
|                                                                                                 | Jamais<br>ces 4<br>dernières<br>semaines | 1 x par<br>mois | 2 à 3 x<br>par mois | 1 à 2 x<br>par<br>semaine | 3 à 4 x<br>par<br>semaine | 1 x par<br>jour | 2 x ou<br>plus par<br>jour | Portion de<br>référence                | Votre portion |        |      |  |
|                                                                                                 |                                          |                 |                     |                           |                           |                 |                            |                                        | moins         | pareil | plus |  |
| FRUITS                                                                                          |                                          |                 |                     |                           |                           |                 |                            |                                        |               |        |      |  |
| Banane, pomme,<br>poire, prune, raisin                                                          |                                          |                 |                     |                           |                           |                 |                            | 150 g = 1 fruit ou<br>1 petite grappe  |               |        |      |  |
| Orange, mandarine<br>clémentine                                                                 |                                          |                 |                     |                           |                           |                 |                            | 150 g = taille<br>d'une orange         |               |        |      |  |
| Pêche, nectarine,<br>abricot, melon                                                             |                                          |                 |                     |                           |                           |                 |                            | 150 g = taille<br>d'une pêche          |               |        |      |  |
| Fraises, framboises,<br>myrtilles, cassis                                                       |                                          |                 |                     |                           |                           |                 |                            | 120 g = 1 petite<br>barquette          |               |        |      |  |
| Kiwi                                                                                            |                                          |                 |                     |                           |                           |                 |                            | 80 g = 1 fruit                         |               |        |      |  |
| Fruits en conserve,<br>compote sucrée                                                           |                                          |                 |                     |                           |                           |                 |                            | 150 g = taille du<br>gobelet de yaourt |               |        |      |  |

| 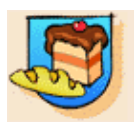<br>ALIMENTS | FREQUENCE                                |                 |                     |                           |                           |                 |                            | QUANTITE                      |               |        |      |
|-----------------------------------------------------------------------------------------------|------------------------------------------|-----------------|---------------------|---------------------------|---------------------------|-----------------|----------------------------|-------------------------------|---------------|--------|------|
|                                                                                               | Jamais<br>ces 4<br>dernières<br>semaines | 1 x par<br>mois | 2 à 3 x<br>par mois | 1 à 2 x<br>par<br>semaine | 3 à 4 x<br>par<br>semaine | 1 x par<br>jour | 2 x ou<br>plus par<br>jour | Portion de<br>référence       | Votre portion |        |      |
|                                                                                               |                                          |                 |                     |                           |                           |                 |                            |                               | moins         | pareil | plus |
| PÂTISSERIES, SUCRERIES                                                                        |                                          |                 |                     |                           |                           |                 |                            |                               |               |        |      |
| Croissant,<br>pain au chocolat                                                                |                                          |                 |                     |                           |                           |                 |                            | 1 pièce                       |               |        |      |
| Tarte aux fruits                                                                              |                                          |                 |                     |                           |                           |                 |                            | 120 g = 1<br>tranche          |               |        |      |
| Gâteau à la crème                                                                             |                                          |                 |                     |                           |                           |                 |                            | 90 g = 1 gâteau               |               |        |      |
| Cake,<br>pâtisserie sèche                                                                     |                                          |                 |                     |                           |                           |                 |                            | 90 g =<br>1 grosse<br>tranche |               |        |      |
| Biscuits secs,<br>cookies                                                                     |                                          |                 |                     |                           |                           |                 |                            | 20 g = 3<br>biscuits          |               |        |      |
| Chocolat                                                                                      |                                          |                 |                     |                           |                           |                 |                            | 15 g = 3 carrés               |               |        |      |
| Confiture, miel                                                                               |                                          |                 |                     |                           |                           |                 |                            | 20 g =<br>1 cuil soupe        |               |        |      |
| Glace, sorbet                                                                                 |                                          |                 |                     |                           |                           |                 |                            | 100 g = 1 boule               |               |        |      |
| Sucre artificiel<br>(assugrin, aspartam)                                                      |                                          |                 |                     |                           |                           |                 |                            | 1 comprimé                    |               |        |      |
| Sucre                                                                                         |                                          |                 |                     |                           |                           |                 |                            | 1 morceau et ½                |               |        |      |
| POUR CUISINER                                                                                 |                                          |                 |                     |                           |                           |                 |                            |                               |               |        |      |
| Beurre                                                                                        |                                          |                 |                     |                           |                           |                 |                            | 10 g =<br>portion bistrot     |               |        |      |
| Margarine                                                                                     |                                          |                 |                     |                           |                           |                 |                            | 10 g =<br>1 cuil à café       |               |        |      |
| Huile d'olive                                                                                 |                                          |                 |                     |                           |                           |                 |                            | 2 cuil à café                 |               |        |      |
| Huile d'arachide                                                                              |                                          |                 |                     |                           |                           |                 |                            | 2 cuil à café                 |               |        |      |
| Huile de tournesol                                                                            |                                          |                 |                     |                           |                           |                 |                            | 2 cuil à café                 |               |        |      |
| VITAMINES, SUPPLÉMENTS ALIMENTAIRES                                                           |                                          |                 |                     |                           |                           |                 |                            |                               |               |        |      |
| Vitamine C                                                                                    |                                          |                 |                     |                           |                           |                 |                            | 500 mg                        |               |        |      |
| Vitamine E                                                                                    |                                          |                 |                     |                           |                           |                 |                            | 1'000 mg                      |               |        |      |
| Multivitamines                                                                                |                                          |                 |                     |                           |                           |                 |                            | 1 comprimé                    |               |        |      |
| Son                                                                                           |                                          |                 |                     |                           |                           |                 |                            | 1 cuil à soupe                |               |        |      |
| Comprimé d'ail                                                                                |                                          |                 |                     |                           |                           |                 |                            | 1 comprimé                    |               |        |      |

| 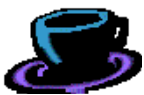<br><b>ALIMENTS</b> | FREQUENCE                                |                 |                     |                           |                           |                 |                            | QUANTITE                     |               |        |      |
|------------------------------------------------------------------------------------------------------|------------------------------------------|-----------------|---------------------|---------------------------|---------------------------|-----------------|----------------------------|------------------------------|---------------|--------|------|
|                                                                                                      | Jamais<br>ces 4<br>dernières<br>semaines | 1 x par<br>mois | 2 à 3 x<br>par mois | 1 à 2 x<br>par<br>semaine | 3 à 4 x<br>par<br>semaine | 1 x par<br>jour | 2 x ou<br>plus par<br>jour | Portion de<br>référence      | Votre portion |        |      |
|                                                                                                      |                                          |                 |                     |                           |                           |                 |                            |                              | moins         | pareil | plus |
| <b>BOISSONS</b>                                                                                      |                                          |                 |                     |                           |                           |                 |                            |                              |               |        |      |
| Café (sauf décafé)                                                                                   |                                          |                 |                     |                           |                           |                 |                            | 1 tasse                      |               |        |      |
| Lait écrémé (à 0%)<br>dans le café                                                                   |                                          |                 |                     |                           |                           |                 |                            | 2 cuil à soupe               |               |        |      |
| Lait entier ou mi-<br>écrémé dans le café                                                            |                                          |                 |                     |                           |                           |                 |                            | 2 cuil à soupe               |               |        |      |
| Crème à café                                                                                         |                                          |                 |                     |                           |                           |                 |                            | 1 portion de<br>bistrot      |               |        |      |
| Lait écrémé (à 0%) à<br>boire                                                                        |                                          |                 |                     |                           |                           |                 |                            | 2 dl = 1 verre               |               |        |      |
| Lait entier ou mi-<br>écrémé à boire                                                                 |                                          |                 |                     |                           |                           |                 |                            | 2 dl = 1 verre               |               |        |      |
| Aproz, Valser, San<br>Pellegrino, Passuger                                                           |                                          |                 |                     |                           |                           |                 |                            | 2 dl = 1 verre               |               |        |      |
| Perrier, Vittel, Volvic                                                                              |                                          |                 |                     |                           |                           |                 |                            | 2 dl = 1 verre               |               |        |      |
| Eau du robinet,<br>Henniez, Evian, Vichy                                                             |                                          |                 |                     |                           |                           |                 |                            | 2 dl = 1 verre               |               |        |      |
| Limonade, coca,<br>soda, sirop de fruits                                                             |                                          |                 |                     |                           |                           |                 |                            | 2 dl = 1 verre               |               |        |      |
| Jus de fruits frais                                                                                  |                                          |                 |                     |                           |                           |                 |                            | 2 dl = 1 verre               |               |        |      |
| Jus de fruits en<br>bouteille ou en brique                                                           |                                          |                 |                     |                           |                           |                 |                            | 2 dl = 1 verre               |               |        |      |
| Thé, infusion                                                                                        |                                          |                 |                     |                           |                           |                 |                            | 2 dl = 1 tasse               |               |        |      |
| Bière                                                                                                |                                          |                 |                     |                           |                           |                 |                            | 3 dl = 1<br>canette          |               |        |      |
| Vin, champagne                                                                                       |                                          |                 |                     |                           |                           |                 |                            | 1 dl et ½ =<br>1 verre à vin |               |        |      |
| Apéritifs type<br>anissette, Martini                                                                 |                                          |                 |                     |                           |                           |                 |                            | ½ dl =<br>¼ de verre         |               |        |      |
| Alcool fort type<br>whisky, eau de vie,<br>liqueur                                                   |                                          |                 |                     |                           |                           |                 |                            | 1 dl = ½ verre               |               |        |      |
| <b>AUTRES</b><br><br><b>ALIMENTS</b>                                                                 | FREQUENCE                                |                 |                     |                           |                           |                 |                            | QUANTITE                     |               |        |      |
|                                                                                                      | Jamais<br>ces 4<br>dernières<br>semaines | 1 x par<br>mois | 2 à 3 x<br>par mois | 1 à 2 x<br>par<br>semaine | 3 à 4 x<br>par<br>semaine | 1 x par<br>jour | 2 x ou<br>plus par<br>jour | Portion de<br>référence      | Votre portion |        |      |
|                                                                                                      |                                          |                 |                     |                           |                           |                 |                            |                              | moins         | pareil | plus |
| <b>S'IL MANQUE DES ALIMENTS QUE VOUS AVEZ MANGÉ LE MOIS DERNIER, DÉCRIVEZ-LES CI-DESSOUS</b>         |                                          |                 |                     |                           |                           |                 |                            |                              |               |        |      |
|                                                                                                      |                                          |                 |                     |                           |                           |                 |                            |                              |               |        |      |
|                                                                                                      |                                          |                 |                     |                           |                           |                 |                            |                              |               |        |      |
|                                                                                                      |                                          |                 |                     |                           |                           |                 |                            |                              |               |        |      |
